# Supplementary material for: Determination of nucleotide and enzyme degradation in haddock (Melanogrammus aeglefinus) and herring (Clupea harengus) after high pressure processing
Source: PeerJ. 2019 Aug 27;7:e7527. doi: 10.7717/peerj.7527 (PMC6716499; doi:10.7717/peerj.7527)
Supplement: Supplemental Information 1 [file peerj-07-7527-s001.xls]

## Sheet: Haddock all 
		ATP	ADP	AMP	IMP	INO	HX		ATP	ADP	AMP	IMP	INO	HX
0 Day	Control	0.0594183	0.432692	0.287691	5.69149	3.6639	0.667911		0.0537089	0.375125	0.0467043	0.690845	0.544826	0.169509
	200 MPa 1 min	0.196392	0.450021	0.251368	6.96443	4.31763	0.774638		0.164664	0.391712	0.205298	2.25392	0.952151	0.410691
	200 MPa 3 min	0.14503	0.362379	0.243915	6.45338	3.85416	0.429703		0.110428	0.294806	0.116455	1.99166	0.803288	0.315504
	250 MPa 1 min	0.0693191	0.159886	0.0777094	6.87672	4.05946	0.743675		0.00913011	0.106715	0.0147693	0.882582	1.32795	0.450712
	250 MPa 3 min	0.0899485	0.432453	0.237411	6.31751	3.96648	0.547097		0.0196465	0.311364	0.0939839	3.17387	0.782545	0.255003
	300 MPa 1 min	0.101811	0.276683	0.217234	4.06057	5.49449	0.741682		0.0353623	0.205099	0.117187	3.49078	3.08402	0.230698
	300 MPa 3 min	0.0349087	0.0564622	0.270312	5.00711	2.96202	1.05276		0.0169469	0.0462987	0.102998	2.62679	1.65364	0.320938
2 Day
	Control	0.124817	0.461643	0.316165	5.30159	4.1634	0.858042		0.0391188	0.37751	0.0538527	0.465495	1.83026	0.368296
	200 MPa 1 min	0.116249	0.383224	0.344935	3.14949	5.76635	1.14492		0.0823891	0.325185	0.0842627	1.72563	1.20998	0.611569
	200 MPa 3 min	0.133983	0.355806	0.268331	3.2271	6.57497	0.553283		0.037671	0.292379	0.0643742	2.63374	2.80172	0.14079
	250 MPa 1 min	0.0443702	0.122765	0.100896	4.69676	4.85388	1.08442		0.0297608	0.10414	0.111037	3.30107	0.271587	0.507785
	250 MPa 3 min	0.092205	0.337374	0.330912	2.63251	5.30886	1.17447		0.0364321	0.296765	0.0192386	3.24581	2.57491	0.576732
	300 MPa 1 min	0.0717117	0.225088	0.219967	3.98195	6.01437	0.695311		0.0233314	0.14376	0.0898905	2.17023	2.13441	0.251784
	300 MPa 3 min	0.0378826	0.0458932	0.190993	3.6221	6.20345	0.82618		0.029	0.0298828	0.0356222	1.97135	0.864916	0.370069
4 Day
	Control	0.060248	0.405279	0.410936	2.44494	5.41815	1.98238		0.0149849	0.308559	0.124745	2.06759	0.901252	0.499967
	200 MPa 1 min	0.149154	0.443567	0.323397	2.29779	6.09489	1.34485		0.124377	0.356195	0.141564	2.44502	2.22767	0.398384
	200 MPa 3 min	0.0846357	0.364148	0.28036	1.88344	6.39348	1.29054		0.0458177	0.255562	0.00818067	1.42043	2.1365	0.639299
	250 MPa 1 min	0.0700232	0.182945	0.137132	1.26483	7.16149	1.60701		0.00837172	0.110423	0.0451233	0.749702	1.67467	0.982867
	250 MPa 3 min	0.0821107	0.405508	0.288016	3.56208	5.00837	1.1424		0.0268274	0.279317	0.0907886	2.15279	1.0175	0.492223
	300 MPa 1 min	0.0850837	0.234035	0.241569	2.69575	6.67564	1.83606		0.0306509	0.134011	0.0577913	2.3915	2.05997	1.36205
	300 MPa 3 min	0.0384595	0.0501233	0.201364	1.81241	7.28783	2.04678		0.0180243	0.0391246	0.137129	0.192993	2.74649	1.36907
6 Day
	Control	0.180366	0.456414	0.402006	1.21604	4.74645	3.34239		0.206462	0.282821	0.0277066	1.13308	1.82714	0.947133
	200 MPa 1 min	0.109734	0.381363	0.310256	0.586554	3.92289	1.75436		0.123439	0.221882	0.0983581	0.572223	3.30121	2.10448
	200 MPa 3 min	0.0708331	0.145113	1.17449	2.78209	4.00798	2.18499		0.0852907	0.157105	1.60724	1.75226	0.899782	0.865829
	250 MPa 1 min	0.0341908	0.104853	0.0970384	3.34206	7.2546	4.9169		0.0335041	0.0728814	0.114775	3.53288	1.40057	4.29355
	250 MPa 3 min	0.156903	0.962288	0.706369	1.73825	5.02443	2.29051		0.220642	1.12491	0.561784	0.356415	4.04049	1.20841
	300 MPa 1 min	0.95336	0.413173	0.150171	2.37626	6.56072	2.27728		1.50626	0.41376	0.103217	2.77356	2.0848	1.95713
	300 MPa 3 min	0.016832	0.31546	0.166619	1.98259	6.45207	2.10771		0.0218201	0.470007	0.163394	1.41431	1.18568	1.04135
10 Day
	Control	0.104963	0.492466	0.389198	0.25105	3.16764	8.53574		0.0558229	0.311854	0.0348186	0.250563	1.69852	5.85342
	200 MPa 1 min	0.106893	0.493979	0.417999	0.460462	6.62331	3.55301		0.0564562	0.276266	0.103344	0.319245	2.4769	1.41647
	200 MPa 3 min	0.0701626	0.400999	0.278798	0.675679	6.92444	3.04094		0.0154469	0.244652	0.00745613	0.445193	1.94366	2.07117
	250 MPa 1 min	0.0436546	0.109006	0.133484	1.10273	6.96535	2.36088		0.0344428	0.0944826	0.0191151	1.22127	1.88652	1.37186
	250 MPa 3 min	0.104408	0.458107	0.355476	0.59715	6.98846	3.12771		0.0355952	0.270747	0.04331	0.186771	1.6606	1.91455
	300 MPa 1 min	0.0704624	0.261631	0.178126	0.474154	7.44964	2.6064		0.0245766	0.170931	0.0589437	0.243356	2.06429	1.83958
	300 MPa 3 min	0.0501999	0.020505	0.0703033	0.194571	5.86728	2.6101		0.0477162	0.00983262	0.0395878	0.208799	3.21147	1.38095
14 Day
	Control	0.236206	0.499923	0.373398	0.0638066	1.32385	9.93086		0.283426	0.434294	0.132466	0.0352262	1.60189	5.48597
	200 MPa 1 min	0.172195	0.492855	0.390909	0.0971029	4.91021	5.43938		0.161897	0.304999	0.0114334	0.0213008	2.42515	1.85221
	200 MPa 3 min	0.106667	0.491676	0.283011	0.337887	5.89157	3.95501		0.0649206	0.179498	0.125702	0.504202	1.12312	3.10514
	250 MPa 1 min	0.045332	0.117168	0.0947339	1.07109	6.11087	2.71521		0.0190623	0.0737482	0.0613051	1.10514	1.4017	1.30926
	250 MPa 3 min	0.157246	0.442625	0.347315	0.176682	4.10785	5.04664		0.160048	0.257416	0.0693333	0.154234	1.36644	1.86521
	300 MPa 1 min	0.0955709	0.349639	0.265191	0.0945622	6.97477	3.06486		0.0508796	0.121296	0.139279	0.0410103	1.89757	1.40525
	300 MPa 3 min	0.023151	0.0379067	0.0593639	0.113047	7.58279	3.49751		0.00425599	0.023764	0.0289854	0.068124	2.60592	2.31282

## Sheet: Herring calculation
		ATP umole/g	ADP umole/g	AMP umole/g	IMP umole/g	INO umole/g	HX umole/g		ATP umole/g	ADP umole/g	AMP umole/g	IMP umole/g	INO umole/g	HX umole/g
0 Day	Control	0.0944848	0.102014	0.198204	5.65826	1.13165	0.510536		0.0213717	0.0253963	0.0855863	1.61633	0.323266	0.204947
	200 MPa 1 min	0.0906039	0.0685277	0.225834	5.88398	1.1768	0.752877		0.0236018	0.0526159	0.0485463	2.6827	0.536539	0.413525
	200 MPa 3 min	0.07817	0.0730631	0.170785	5.48495	1.09699	0.52898		0.00489262	0.00440698	0.0152628	1.68018	0.336036	0.178009
	250 MPa 1 min	0.066683	0.0871655	0.15002	5.15483	1.03097	0.727166		0.0449813	0.0215587	0.0114458	1.57077	0.314153	0.612671
	250 MPa 3 min	0.102147	0.0641347	0.19045	5.6392	1.12784	0.548671		0.0313653	0.0497033	0.0267748	2.32089	0.464179	0.159519
	300 MPa 1 min	0.0602511	0.0631813	0.176021	6.05432	1.21086	0.416073		0.0293564	0.00780105	0.0511229	0.449656	0.0899312	0.0979632
	300 MPa 3 min	0.0670994	0.0373925	0.0973898	6.50013	1.30003	0.577448		0.0267263	0.0087285	0.0255073	0.643491	0.128698	0.199552
2 Day
	Control	0.0805047	0.114804	0.390279	2.35828	0.471656	2.25961		0.0597397	0.00720846	0.0557698	0.424604	0.0849208	0.431391
	200 MPa 1 min	0.0567415	0.126284	0.287203	4.46488	0.892976	1.62655		0.0634185	0.0558305	0.0661867	0.409044	0.0818088	0.41999
	200 MPa 3 min	0.0982546	0.127574	0.244674	4.04729	0.809458	1.25248		0.0296193	0.0133724	0.00550004	2.09821	0.419642	0.118467
	250 MPa 1 min	0.0495714	0.0878849	0.278519	5.26738	1.05348	1.50746		0.043979	0.0202212	0.00300657	2.72403	0.544806	0.54811
	250 MPa 3 min	0.089357	0.153239	0.318217	4.61578	0.923155	1.51462		0.0789608	0.0976277	0.03318	1.70541	0.341082	0.357544
	300 MPa 1 min	0.0579686	0.0911183	0.399353	2.9054	0.58108	2.03597		0.0356512	0.0178506	0.174488	2.29973	0.459946	0.723209
	300 MPa 3 min	0.0509525	0.0329876	0.179617	4.9231	0.98462	1.58223		0.0179378	0.0198348	0.106128	3.17387	0.634774	0.97786
4 Day
	Control	0.156881	0.228644	0.228125	4.82162	0.964324	2.10703		0.0242687	0.034066	0.158225	2.23566	0.447131	0.766772
	200 MPa 1 min	0.153946	0.224727	0.2072	4.59808	0.919617	1.91941		0.103882	0.0422151	0.0991103	3.17841	0.635682	0.75087
	200 MPa 3 min	0.106287	0.201289	0.162848	3.55547	0.711093	1.83512		0.0405202	0.00947409	0.0951319	1.15827	0.231654	0.152021
	250 MPa 1 min	0.116059	0.143184	0.0870014	4.91271	0.982542	1.72722		0.0492328	0.0442197	0.0625652	1.49649	0.299298	0.563702
	250 MPa 3 min	0.07972	0.209363	0.191034	5.41241	1.08248	1.93075		0.0121923	0.0182344	0.145249	0.751946	0.150389	1.08389
	300 MPa 1 min	0.0886632	0.186127	0.0851992	4.9425	0.9885	2.1688		0.0672493	0.0473986	0.132786	0.925444	0.185089	0.557164
	300 MPa 3 min	0.0928483	0.0557981	0.0561735	3.75056	0.750112	1.8115		0.0257774	0.045794	0.0605432	1.67373	0.334746	0.376897
6 Day
	Control	0.075856	0.17222	0.175246	1.48022	0.296043	5.719		0.0294251	0.016823	0.176192	1.40062	0.280124	2.09508
	200 MPa 1 min	0.112146	0.170874	0.107757	3.849	0.769801	2.777		0.0192772	0.018079	0.0317773	1.35472	0.270945	1.56804
	200 MPa 3 min	0.0870005	0.143833	0.0526089	3.19531	0.639063	2.31432		0.0121664	0.0136098	0.0403266	1.70552	0.341104	1.40468
	250 MPa 1 min	0.0996804	0.107195	0.0378955	3.28221	0.656443	1.84301		0.0274316	0.0557005	0.0344121	2.68216	0.536431	0.760236
	250 MPa 3 min	0.103543	0.194799	0.018206	6.82316	1.36463	1.87388		0.0401849	0.0236414	0.0148876	1.56331	0.312662	0.987877
	300 MPa 1 min	0.10871	0.149792	0.0906085	1.61043	0.322086	1.82781		0.0206361	0.00431576	0.0425811	0.360515	0.072103	0.0742636
	300 MPa 3 min	0.0490211	0.0415416	0.0207585	4.0822	0.816441	1.86122		0.00631813	0.0624948	0.0179919	4.4335	0.8867	0.966946
10 Day
	Control	0.0970348	0.171936	0.554381	1.13016	0.226031	8.26599		0.0621092	0.0135836	0.140087	1.47825	0.29565	3.36586
	200 MPa 1 min	0.0959751	0.157741	0.642642	0.748303	0.149661	6.68907		0.0536577	0.0528762	0.152856	0.292405	0.058481	3.24245
	200 MPa 3 min	0.101704	0.180135	0.545136	1.39186	0.278372	3.65		0.0538409	0.0508233	0.267733	1.32108	0.264216	1.68125
	250 MPa 1 min	0.093554	0.143106	0.361818	1.31388	0.262775	2.55007		0.0901828	0.0418375	0.113097	0.835018	0.167004	0.532693
	250 MPa 3 min	0.106957	0.190287	1.22814	1.12409	0.224817	5.59658		0.0370567	0.052876	1.36221	0.450178	0.0900356	3.02469
	300 MPa 1 min	0.121366	0.173254	0.447369	1.25009	0.250017	2.60097		0.0993329	0.0402751	0.119385	0.681738	0.136348	0.469969
	300 MPa 3 min	0.152861	0.0351953	0.24973	1.58619	0.317237	2.38546		0.154887	0.0162428	0.0255919	1.08905	0.217809	0.536179
14 Day
	Control	0.157508	0.163572	0.557558	0.23142	0.046284	10.4345		0.136756	0.016423	0.120195	0.167612	0.0335225	0.670669
	200 MPa 1 min	0.0529045	0.186488	0.393784	0.842863	0.168573	8.6493		0.043663	0.0101319	0.302876	1.03878	0.207757	3.08901
	200 MPa 3 min	0.0615002	0.178624	0.415491	0.307992	0.0615983	6.50515		0.0352466	0.0216977	0.0678007	0.0776199	0.015524	2.36981
	250 MPa 1 min	0.0535194	0.1127	0.337638	1.50968	0.301937	2.33422		0.0461768	0.0553957	0.152181	1.74878	0.349755	0.809083
	250 MPa 3 min	0.0530781	0.193853	0.480378	0.849082	0.169816	5.07192		0.0368919	0.0442712	0.0402116	0.646604	0.129321	3.85872
	300 MPa 1 min	0.0802329	0.142401	0.365663	0.817416	0.163483	4.38269		0.0118507	0.0277526	0.0492516	0.777154	0.155431	2.90476
	300 MPa 3 min	0.0433938	0.0365869	0.276629	0.744915	0.148983	2.52504		0.00893281	0.024596	0.137669	0.767414	0.153483	0.565947
